# Supplementary material for: Mutations in Caenorhabditis elegans eIF2β Permit Translation Initiation From Non-AUG Start Codons
Source: Oxford University Press journal article supplement (doi:10.1534/genetics.110.115485), 2010-03-10
Supplement: 115485_si.pdf [file 115485_si.pdf]

# GENETICS

## Supporting Information

<http://www.genetics.org/cgi/content/full/genetics.110.115485/DC1>

### **Mutations in the *Caenorhabditis elegans* eIF2 $\beta$ Permit Translation Initiation From Non-AUG Start Codons**

Yinhua Zhang and Lisa L. Maduzia

Copyright © 2010 by the Genetics Society of America  
DOI: 10.1534/genetics.110.115485

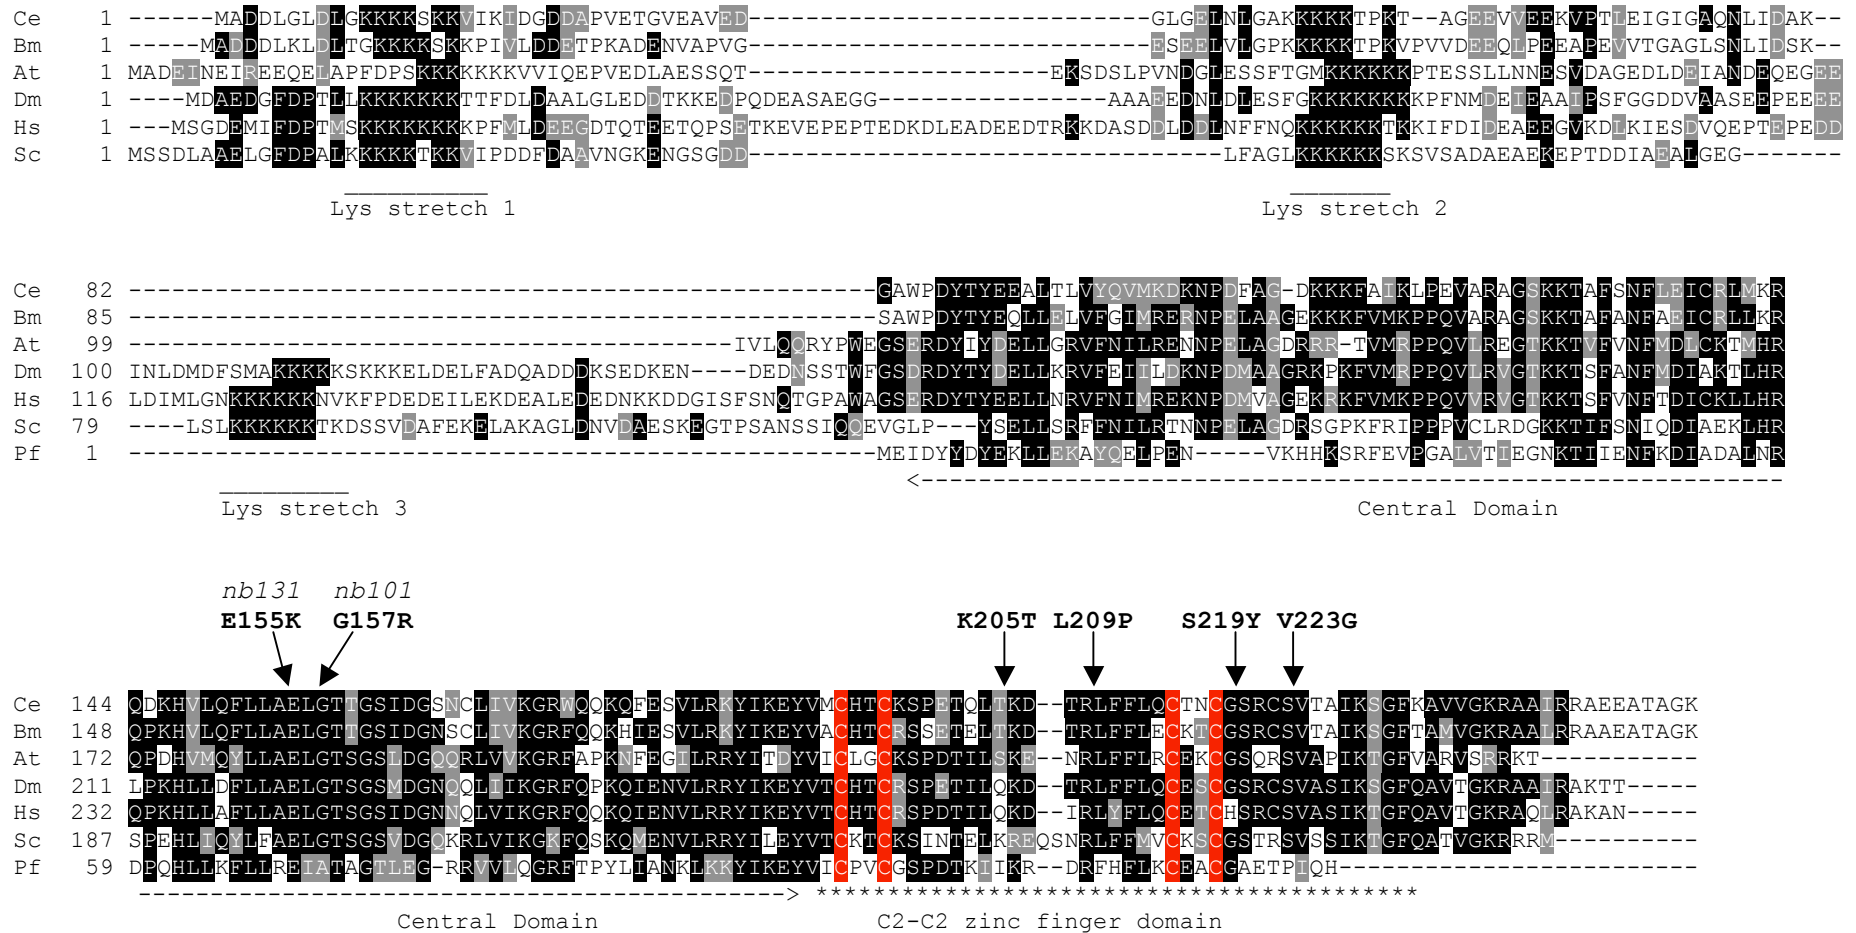

FIGURE S1.—Sequence Alignment of eIF2 $\beta$ s. Species names: Ce, *Caenorhabditis elegans*; Bm, *Brugia malayi* (a parasitic nematode); At, *Arabidopsis thaliana*; Dm, *Drosophila melanogaster*; Hs, *Homo sapiens*; Sc, *Saccharomyces cerevisiae*; Pf, *Pyrococcus furiosus*.
